# Supplementary material for: Taxonomic identification and biological traits ofPlatystethynium triclavatum(Donev & Huber, 2002), comb. n. (Hymenoptera, Mymaridae), a newly recorded egg parasitoid of the Italian endemic pestBarbitistes vicetinus(Orthoptera, Tettigoniidae)
Source: PeerJ journal article supplement (doi:10.7717/peerj.9667), 2020-08-12
Supplement: Raw_data.xlsx [file Raw_data.xlsx]

## Sheet: raw data
site	plot	egg_total	egg_hatched	egg_flattened	egg_fertile	egg_with_holes	elevation
1	1	221	214	3	3	1	99
1	2	67	59	2	4	2	99
1	3	242	227	3	8	4	99
1	4	23	23	0	0	0	99
1	5	120	107	1	9	3	99
1	6	269	256	2	10	1	99
2	1	270	145	81	43	1	66
2	2	399	298	59	35	7	66
2	3	473	355	77	32	9	66
2	4	85	70	12	2	1	66
2	5	178	126	46	6	0	66
2	6	82	79	0	2	1	66
3	1	102	85	2	15	0	152
3	2	115	107	3	3	2	152
3	3	30	21	1	8	0	152
3	4	111	87	3	12	9	152
3	5	64	51	0	11	2	152
3	6	50	43	0	3	4	152
4	1	43	37	0	3	3	54
4	2	35	29	0	4	2	54
4	3	37	28	2	6	1	54
4	4	120	91	8	14	7	54
4	5	116	107	0	4	5	54
4	6	241	196	4	28	13	54
5	1	109	80	8	19	2	261
5	2	374	330	22	20	2	261
5	3	220	154	22	42	2	261
5	4	270	223	28	15	4	261
5	5	115	86	5	20	4	261
5	6	206	168	15	11	12	261
6	1	129	105	11	0	13	294
6	2	419	272	99	31	17	294
6	3	77	46	2	26	3	294
6	4	137	113	0	9	15	294
6	5	82	77	1	1	3	294
6	6	134	102	10	4	18	294
7	1	93	93	0	0	0	167
7	2	298	298	0	0	0	167
7	3	141	141	0	0	0	167
7	4	82	82	0	0	0	167
7	5	31	28	3	0	0	167
7	6	118	114	4	0	0	167
8	1	269	212	16	32	9	481
8	2	75	63	3	6	3	481
8	3	29	29	0	0	0	481
8	4	35	34	0	0	1	481
8	5	92	61	2	24	5	481
8	6	77	64	9	3	1	481
9	1	49	47	0	0	2	129
9	2	57	27	29	1	0	129
9	3	44	41	0	0	3	129
9	4	14	13	0	0	1	129
9	5	16	16	0	0	0	129
9	6	63	19	44	0	0	129
10	1	148	110	32	4	2	337
10	2	279	263	7	7	2	337
10	3	492	432	25	27	8	337
10	4	493	403	33	41	16	337
10	5	403	330	33	22	18	337
10	6	370	312	28	21	9	337
11	1	344	307	0	17	20	144
11	2	40	35	0	1	4	144
11	3	152	146	3	3	0	144
11	4	375	312	42	2	19	144
11	5	156	138	12	2	4	144
11	6	381	336	21	16	8	144
12	1	61	44	4	5	8	456
12	2	357	261	21	32	43	456
12	3	74	55	5	5	9	456
12	4	107	72	12	9	14	456
12	5	78	61	4	1	12	456
12	6	102	90	4	2	6	456
13	1	200	179	15	1	5	369
13	2	26	26	0	0	0	369
13	3	694	574	85	25	10	369
13	4	127	75	22	24	6	369
13	5	373	328	26	9	10	369
13	6	118	104	12	0	2	369
14	1	83	61	19	3	0	111
14	2	127	116	11	0	0	111
14	3	717	388	280	43	6	111
14	4	233	174	49	9	1	111
14	5	185	134	45	6	0	111
14	6	350	266	63	19	2	111
15	1	9	9	0	0	0	48
15	2	37	37	0	0	0	48
15	3	17	17	0	0	0	48
15	4	13	13	0	0	0	48
15	5	35	32	3	0	0	48
15	6	16	10	5	1	0	48
16	1	16	12	4	0	0	71
16	2	11	7	4	0	0	71
16	3	56	30	25	1	0	71
16	4	56	30	18	0	8	71
16	5	41	28	13	0	0	71
16	6	11	11	0	0	0	71
17	1	256	226	21	6	3	467
17	2	230	190	30	6	4	467
17	3	241	181	43	13	4	467
17	4	1249	1070	107	59	13	467
17	5	336	262	47	18	9	467
17	6	456	350	86	10	10	467
18	1	19	14	5	0	0	168
18	2	185	128	53	3	1	168
18	3	60	37	20	3	0	168
18	4	34	30	3	1	0	168
18	5	216	188	27	1	0	168
18	6	185	134	38	12	1	168
19	1	4	2	0	2	0	39
19	2	6	6	0	0	0	39
19	3	14	9	0	4	1	39
19	4	1	1	0	0	0	39
19	5	4	4	0	0	0	39
19	6	5	5	0	0	0	39
20	1	57	45	11	0	1	268
20	2	81	56	19	2	4	268
20	3	54	24	28	0	2	268
20	4	106	47	50	7	2	268
20	5	27	23	3	0	1	268
20	6	19	11	5	3	0	268
21	1	94	83	3	4	4	462
21	2	9	8	0	0	1	462
21	3	24	20	2	0	2	462
21	4	57	54	3	0	0	462
21	5	9	8	1	0	0	462
21	6	33	30	0	0	3	462
22	1	155	77	68	10	0	159
22	2	388	256	93	38	1	159
22	3	523	215	185	123	0	159
22	4	427	396	17	13	1	159
22	5	95	38	56	1	0	159
22	6	70	59	11	0	0	159
23	1	32	14	2	16	0	72
23	2	5	4	1	0	0	72
23	3	60	45	2	13	0	72
23	4	21	12	2	7	0	72
23	5	31	25	5	1	0	72
23	6	104	97	0	6	1	72
24	1	39	28	8	3	0	193
24	2	17	13	4	0	0	193
24	3	6	6	0	0	0	193
24	4	11	9	0	2	0	193
24	5	23	16	2	5	0	193
24	6	48	28	3	17	0	193
25	1	20	15	4	1	0	311
25	2	79	61	11	6	1	311
25	3	38	21	9	7	1	311
25	4	18	13	3	2	0	311
25	5	61	40	9	11	1	311
25	6	282	175	94	13	0	311
26	1	2	2	0	0	0	37
26	2	4	4	0	0	0	37
26	3	0	0	0	0	0	37
26	4	9	8	1	0	0	37
26	5	0	0	0	0	0	37
26	6	41	21	0	20	0	37
27	1	28	28	0	0	0	12
27	2	28	26	0	2	0	12
27	3	22	21	0	0	1	12
27	4	27	26	0	1	0	12
27	5	18	11	0	6	1	12
27	6	37	35	0	1	1	12
28	1	32	27	5	0	0	113
28	2	25	10	15	0	0	113
28	3	1	1	0	0	0	113
28	4	2	2	0	0	0	113
28	5	6	6	0	0	0	113
28	6	54	39	15	0	0	113
29	1	19	10	9	0	0	331
29	2	15	15	0	0	0	331
29	3	6	5	0	0	1	331
29	4	8	7	0	0	1	331
29	5	18	6	5	7	0	331
29	6	43	20	1	17	5	331
30	1	1	1	0	0	0	208
30	2	5	5	0	0	0	208
30	3	1	1	0	0	0	208
30	4	12	12	0	0	0	208
30	5	9	4	3	2	0	208
30	6	4	3	0	1	0	208
31	1	3	3	0	0	0	131
31	2	5	5	0	0	0	131
31	3	6	6	0	0	0	131
31	4	2	1	0	0	1	131
31	5	7	3	0	4	0	131
31	6	4	4	0	0	0	131
32	1	15	15	0	0	0	220
32	2	19	16	0	2	1	220
32	3	28	14	9	5	0	220
32	4	50	34	9	5	2	220
32	5	2	1	1	0	0	220
32	6	8	8	0	0	0	220
33	1	3	3	0	0	0	371
33	2	26	14	2	9	1	371
33	3	59	56	1	2	0	371
33	4	105	70	1	34	0	371
33	5	50	42	1	6	1	371
33	6	1	1	0	0	0	371
34	1	141	119	1	20	1	233
34	2	76	66	10	0	0	233
34	3	14	13	0	0	1	233
34	4	14	14	0	0	0	233
34	5	11	11	0	0	0	233
34	6	28	20	8	0	0	233
35	1	14	14	0	0	0	155
35	2	6	6	0	0	0	155
35	3	25	24	0	1	0	155
35	4	5	5	0	0	0	155
35	5	43	18	1	24	0	155
35	6	10	8	1	1	0	155
36	1	13	4	4	4	1	82
36	2	2	2	0	0	0	82
36	3	23	20	3	0	0	82
36	4	13	10	3	0	0	82
36	5	4	1	3	0	0	82
36	6	0	0	0	0	0	82
37	1	1	1	0	0	0	41
37	2	2	0	0	2	0	41
37	3	0	0	0	0	0	41
37	4	0	0	0	0	0	41
37	5	5	4	0	1	0	41
37	6	1	1	0	0	0	41
38	1	145	117	12	13	3	160
38	2	218	128	63	21	6	160
38	3	139	90	30	17	2	160
38	4	183	128	24	29	2	160
38	5	86	47	36	2	1	160
38	6	95	75	12	7	1	160
39	1	4	2	0	1	1	182
39	2	108	70	18	19	1	182
39	3	23	20	2	0	1	182
39	4	10	6	3	1	0	182
39	5	334	279	12	43	0	182
39	6	1	1	0	0	0	182
40	1	0	0	0	0	0	61
40	2	2	0	0	2	0	61
40	3	0	0	0	0	0	61
40	4	0	0	0	0	0	61
40	5	0	0	0	0	0	61
40	6	3	2	0	1	0	61
