# Supplementary material for: Taxonomic identification and biological traits ofPlatystethynium triclavatum(Donev & Huber, 2002), comb. n. (Hymenoptera, Mymaridae), a newly recorded egg parasitoid of the Italian endemic pestBarbitistes vicetinus(Orthoptera, Tettigoniidae)
Source: PeerJ journal article supplement (doi:10.7717/peerj.9667), 2020-08-12
Supplement: Raw_data_holes_measurement.xlsx [file Raw_data_holes_measurement.xlsx]

## Sheet: Holes measurement
Holes of fertile eggs (laboratory)
mean	0.34375
se	0.0346378
Holes of previously parasitized eggs (field)
mean	0.326562
se	0.0167982
