# Supplementary material for: Taxonomic identification and biological traits ofPlatystethynium triclavatum(Donev & Huber, 2002), comb. n. (Hymenoptera, Mymaridae), a newly recorded egg parasitoid of the Italian endemic pestBarbitistes vicetinus(Orthoptera, Tettigoniidae)
Source: PeerJ journal article supplement (doi:10.7717/peerj.9667), 2020-08-12
Supplement: Supplemental_Table_S1.docx [file Supplemental_Table_S1.docx]

| **Site** | **Latitude-Longitude** | **Elevation (m)** | **Hatched eggs** | **Flattened eggs** | **Fertile eggs** | **Eggs with holes** | **Total** | **Discovery efficiency (%)** | **Hatched eggs of other species** |
| --- | --- | --- | --- | --- | --- | --- | --- | --- | --- |
| 1 | 45°18'12,42"N - 11°43'46,56"E | 99 | 147.7±39.8 | 1.8±0.5 | 5.7±1.6 | 1.8±0.6 | 157±41.3 | 83 | 0 |
| 2 | 45°20'17,54"N - 11°39'16,71"E | 66 | 178.8±48.6 | 45.8±13.7 | 20±7.6 | 3.2±1.6 | 247.8±66.6 | 83 | 4.6±2.7 |
| 3 | 45°19'19,68"N - 11°43'20,67"E | 152 | 65.7±13.2 | 1.5±0.6 | 8.7±2 | 2.8±1.4 | 78.7±14.5 | 67 | 0 |
| 4 | 45°19'22,6"N - 11°45'19,7"E | 54 | 81.3±26.7 | 2.3±1.3 | 9.8±4 | 5.2±1.8 | 98.7±32.6 | 100 | 8.8±4.4 |
| 5 | 45°19'2,99"N - 11°40'37,03"E | 261 | 173.5±38.2 | 16.7±3.6 | 21.2±4.4 | 4.3±1.6 | 215.7±40.7 | 100 | 6.9±2.1 |
| 6 | 45°21'0,84"N - 11°39'35,85"E | 294 | 119.2±32.2 | 20.5±15.8 | 11.8±5.5 | 11.5±2.8 | 163±52.3 | 100 | 11.2±1.6 |
| 7 | 45°18'36,36"N - 11°46'12,67"E | 167 | 126±37.7 | 1.2±0.7 | 0 | 0 | 127.2±37.4 | 0 | 4.2±1.6 |
| 8 | 45°19'7,58"N - 11°41'33,19"E | 481 | 77.2±27.7 | 5±2.6 | 10.8±5.6 | 3.2±1.4 | 96.2±36 | 83 | 0 |
| 9 | 45°21'10,91"N - 11°41'58,6"E | 129 | 27.2±5.7 | 12.2±7.9 | 0.2±0.2 | 1±0.5 | 40.5±8.5 | 50 | 13.7±5.9 |
| 10 | 45°18'10,09"N - 11°42'1,36"E | 337 | 308.3±47 | 26.3±4.1 | 20.3±5.5 | 9.2±2.8 | 364.2±54.3 | 100 | 0 |
| 11 | 45°20'53,03"N - 11°42'21,6"E | 144 | 212.3±50.2 | 13±6.7 | 6.8±3.1 | 9.2±3.4 | 241.3±58.8 | 83 | 1.2±0.5 |
| 12 | 45°19'4"N - 11°41'20,1"E | 456 | 97.2±33.4 | 8.3±2.8 | 9±4.7 | 15.3±5.7 | 129.8±46 | 100 | 2±2 |
| 13 | 45°21'37,05"N - 11°39'56,92"E | 369 | 214.3±83.8 | 26.7±12.2 | 9.8±4.8 | 5.5±1.7 | 256.3±99.5 | 83 | 0 |
| 14 | 45°16'46,72"N - 11°44'8,68"E | 111 | 189.8±48.5 | 77.8±41.2 | 13.3±6.5 | 1.5±1 | 282.5±94.7 | 50 | 16.3±2.5 |
| 15 | 45°15'41,34"N - 11°40'51,24"E | 48 | 19.7±4.9 | 1.3±0.9 | 0.2±0.2 | 0 | 21.2±4.8 | 0 | 5.8±1.9 |
| 16 | 45°22'30,57"N - 11°40'38,67"E | 71 | 19.7±4.4 | 10.7±3.9 | 0.2±0.2 | 1.3±1.3 | 31.8±8.9 | 17 | 7.5±1.9 |
| 17 | 45°19'17,1"N - 11°41'33,3"E | 467 | 379.8±140.3 | 55.7±13.7 | 18.7±8.3 | 7.2±1.7 | 461.3±161.3 | 100 | 20.3±2.9 |
| 18 | 45°19'1,36"N - 1°46'13,37"E | 168 | 88.5±29 | 24.3±7.9 | 3.3±1.8 | 0.3±0.2 | 116.5±36 | 67 | 0 |
| 19 | 45°15'2,5"N - 11°41'25,9"E | 39 | 4.5±1.2 | 0 | 1±0.7 | 0.2±0.2 | 5.7±1.8 | 16 | 9.3±1.7 |
| 20 | 45°16'55,49"N - 11°42'35,17"E | 268 | 34.3±7.1 | 19.3±7.2 | 2±1.1 | 1.7±0.6 | 57.3±13.3 | 83 | 6.2±1.8 |
| 21 | 45°21'26,55"N - 11°39'23,97"E | 462 | 33.8±12.1 | 1.5±0.6 | 0.7±0.7 | 1.7±0.7 | 37.7±13.4 | 50 | 0 |
| 22 | 45°20'15,17"N – 11°39’40,49”E | 159 | 173.5±57.4 | 71.7±26 | 30.8±19.3 | 0.3±0.2 | 276.3±78.8 | 67 | 32.2±12.8 |
| 23 | 45°20’24,7”N - 11°39'30,78"E | 72 | 32.8±14.1 | 2±0.7 | 7.2±2.6 | 0.2±0.2 | 42.2±14.4 | 17 | 17.2±5.3 |
| 24 | 45°17'50,17"N - 11°37'30,17"E | 193 | 16.7±3.8 | 2.8±1.2 | 4.5±2.6 | 0 | 24±6.7 | 0 | 2±0.9 |
| 25 | 45°19'0,06"N - 11°42'7,02"E | 311 | 54.2±25.3 | 21.7±14.5 | 6.7±1.9 | 0.5±0.2 | 83±41 | 50 | 6.7±3.3 |
| 26 | 45°18'44,96"N - 11°43'59,68"E | 37 | 5.8±3.3 | 0.2±0.2 | 3.3±3.3 | 0±0 | 9.3±6.5 | 0 | 4.8±1.7 |
| 27 | 45°16'38,85''N - 11°44'27,98''E | 12 | 24.5±3.3 | 0 | 1.7±0.9 | 0.5±0.2 | 26.7±2.6 | 50 | 9±1.7 |
| 28 | 45°20'59,99"N - 11°41'52,79"E | 113 | 14.2±6.3 | 5.8±3 | 0 | 0 | 20±8.6 | 0 | 2.7±1.1 |
| 29 | 45°16'48,24"N - 11°43'0,93"E | 331 | 10.5±2.4 | 2.5±1.5 | 4±2.8 | 1.2±0.8 | 18.2±5.4 | 50 | 17.3±7.8 |
| 30 | 45°19'59,64"N 11°40'8,47"E | 208 | 4.3±1.7 | 0.5±0.5 | 0.5±0.3 | 0 | 5.3±1.8 | 0 | 0.8±0.5 |
| 31 | 45°19'32,78"N 11°39'51,68"E | 131 | 3.7±0.7 | 0 | 0.7±0.7 | 0.2±0.2 | 4.5±0.8 | 16 | 0.7±0.3 |
| 32 | 45°21'48,97"N 11°39'24,3"E | 220 | 14.7±4.5 | 3.2±1.9 | 2±1 | 0.5±0.3 | 20.3±7 | 33 | 2.5±0.8 |
| 33 | 45°19'5,18"N 11°42'8,11"E | 371 | 31±11.9 | 0.8±0.3 | 8.5±5.3 | 0.3±0.2 | 40.7±16.1 | 33 | 5.5±2.9 |
| 34 | 45°18'30,26"N 11°39'43,3"E | 233 | 40.5±17.9 | 3.2±1.9 | 3.3±3.3 | 0.3±0.2 | 47.3±21.2 | 33 | 11.5±5.4 |
| 35 | 45°18'56,25"N 11°39'48,75"E | 155 | 12.5±3.1 | 0.3±0.2 | 4.3±3.9 | 0±0 | 17.2±6 | 0 | 2.5±0.4 |
| 36 | 45°17'48,73"N 11°43'47,36"E | 82 | 6.2±3.1 | 2.2±0.7 | 0.7±0.7 | 0.2±0.2 | 9.2±3.6 | 20 | 6.8±3.1 |
| 37 | 45°22'14,54"N 11°41'15,33"E | 41 | 1±0.6 | 0 | 0.5±0.3 | 0 | 1.5±0.8 | 33 | 0.3±0.2 |
| 38 | 45°21'52,24"N 11°43'49,69"E | 160 | 97.5±13.4 | 29.5±7.8 | 14.8±4 | 2.5±0.8 | 144.3±20.6 | 100 | 11.3±2.6 |
| 39 | 45°19'0,54"N 11°43'16,32"E | 182 | 63±44.5 | 5.8±3 | 10.7±7.1 | 0.5±0.2 | 80±53.4 | 50 | 3.7±1.4 |
| 40 | 45°16'21,7"N 11°41'34,77"E | 61 | 0.3±0.3 | 0 | 0.5±0.3 | 0 | 0.8±0.5 | 0 | 0 |
|  | **Mean per site** |  | **474±85** | **78±19** | **42±7** | **14±3** | **608±106** |  | **10±3** |
